# Supplementary material for: Smartphone-Based Retinal Camera Modified for ROP Screening
Source: Research Square preprint supplement (doi:10.21203/rs.3.rs-6867729/v1), 2025-06-18
Supplement: Supplementary file 1 [file 90704861d2fcbc06b43bac32.docx]

|  | Value |
| --- | --- |
| Number of neonates (eyes) | 71 (142) |
| Mean GA (weeks), range | 29 ± 2.31(25-36) |
| Mean BW (grams), range | 1238 ± 351(580–2230) |
| Gender (Female), n (%) | 37 (52) |
| No ROP (neonates), n (%) | 57 (80.3) |
| ROP (neonates), n (%) | 14 (19.7) |
| No ROP (eyes) | 115 |
| ROP (eyes) | 27 |
| ROP stage (eyes), n (%)  Stage 1  Stage2  Stage 3  Stage 4  Stage 5  A-ROP  ROP zones (eyes), n(%)  Zone 1  Zone 2  Zone3  Plus disease (eyes), n (%)  Pre-plus  Plus  No plus | 2 (7.4)  16 (59.2)  5 (18.5)  0  0  4 (14.8)  2 (7.4)  17 (62.9)  8 (29.6)  2 (1.4)  4 (2.8)  136 (95.8) |
| Non-threshold ROP | 8 (16 eyes) |
| Threshold ROP | 6 (11 eyes) |

Table 1. Demographic and clinical data of the study population.

ROP: retinopathy of prematurity; BW, birth weight; GA, gestational age. A-ROP: aggressive ROP.

**Table 2**. Agreement between Device and Reference Standard. Sensitivity, specificity, positive and negative predictive value, and Kappa values ​​of the Eyer portable camera, with and without using scleral indentation to capture images.

| Without scleral indentation |  |
| --- | --- |
| Sensitivity (%) | 82 (CI 76.4–82.7) |
| Specificity (%) | 100 |
| PPV (%) | 100 |
| NPV (%) | 96.7 |
| Kappa | 0.94 (CI 0.78 – 0.99) |
| With scleral indentation |  |
| Sensitivity (%) | 91.3 (CI 86.7–91.4) |
| Specificity (%) | 100 |
| PPV (%) | 100 |
| NPV (%) | 98.3 |
| Kappa | 0.94 (CI 0.87 – 1.00) |

PPV: positive predictive value; NPV: negative predictive value; CI: 95% confidence interval.
